# Supplementary material
Source: PubMed Central journal article supplement (PMC7103389)
Supplement: mmc1.pdf [file mmc1.pdf]

## Supplemental Data

Cell Host & Microbe, Volume 5

### Composition and Three-Dimensional Architecture of the Dengue Virus Replication and Assembly Sites

Sonja Welsch, Sven Miller, Ines Romero-Brey, Andreas Merz, Christopher K. E. Bleck, Paul Walther, Stephen D. Fuller, Claude Antony, Jacomine Krijnse-Locker, and Ralf Bartenschlager

#### Supplemental Experimental Procedures

##### Plasmid Constructs

Standard molecular biology techniques were used for cloning (Sambrook, 2001). The structures of all plasmids were determined by nucleotide sequence and restriction analysis. The full length DENV2 NGC strain cDNA (a kind gift of Andrew Davidson, School of Medical Sciences, Bristol, UK) served as a template for polymerase chain reaction (PCR) amplification of individual DENV genes. For expression of DENV-glutathione-S-transferase (GST)-fusion proteins, DNA fragments encoding for the following amino acids (aa) of the respective DENV proteins were generated by PCR and inserted into the bacterial expression vector pGEX-6P-1 (Amersham Bioscience) in frame with the GST sequence: prM, aa 1 to aa 166; NS1, aa 1 to aa 352, and NS2B, aa 1 to aa 130. PCR fragments encoding for the amino acids of prM (sense primer 5'-AT-ATTGGATCCTTCCATTTAACCACACGTAACGGAG-3', antisense primer 5'-ATAAGATCITTTA-TGTCATTGAAGGAGCGACAGCTGTC-3'), the NS1 protein (sense primer 5'-ATATTGGATCC-GATAGTGGTTGCGTTG-3', antisense primer 5'-ATAAGATCITTTAGGCTGTGACCAAGGA-3'), and NS2B (sense primer 5'-ATATTGGATCCAGCTGGCCACTAAATG-3', antisense primer 5'-A-TAAGATCITTTACCGTGGTTTCTTCACT-3') were inserted into pGEX-6P-1 (Amersham Bioscience, Freiburg, Germany) via the *Bam*HI and *Bgl*II restriction site (underlined).

##### Expression of DENV prM, NS1-, and NS2B-GST Fusion Proteins and Generation of Antisera

For the expression of fragments or full length versions of Glutathione-S-Transferase (GST)-prM, NS1, and NS2B fusion proteins the bacterial expression vector pGEX-6P-1 was used. The constructs were expressed using the *Escherichia coli* strain BL21 codon plus (DE3)-RIL (Stratagene, Amsterdam, Netherlands). After induction with 1mM isopropyl- $\beta$ -D-thiogalactoside (IPTG; AppliChem, Darmstadt, Germany) the cells were grown for 4-6 h at 30°C and afterwards pelleted and ruptured by sonication in phosphate-buffered saline (PBS) supplemented with

protease inhibitors. Pellets obtained after centrifugation (4,000 x g) were treated with different concentrations of urea (3-9 M), and after centrifugation supernatants were separated by SDS-polyacrylamide gel electrophoresis (PAGE) and stained with Coomassie blue. GST-fusion proteins were excised and eluted from the gel slice by using an electro elution chamber (Schleicher & Schuell, Dassel, Germany) as described in the manual. Antisera were raised in New Zealand White rabbits immunized over a period of 4 months with the purified GST fusion proteins (Eurogentec, Seraing, Belgium).

For immunofluorescence studies the monospecific polyclonal antisera were purified by affinity purification as described previously (Miller et al., 2006).

### **Immunofluorescence Microscopy**

Monolayers were grown on glass coverslips and, following infection, fixed at the indicated time in 4% paraformaldehyde. Cells were permeabilized with 0.5% Triton X-100 in PBS, incubated with primary antibodies for 1h in PBS containing 3% bovine serum albumine (BSA), and washed 3 times for 5 min with PBS. Secondary antibody incubation was performed for 45min in PBS containing 3% bovine serum albumine, after which the cells were washed as described above and mounted in Mobiglow (MoBiTec, Göttingen, Germany). Fluorescence images were taken with a Zeiss LSM 510 confocal laser scanning microscope (Carl Zeiss, Jena, Germany) and transferred to a computer workstation running LSM5 Image Browser 3.2 software (Carl Zeiss). Images were merged with Adobe Photoshop CS3 software.

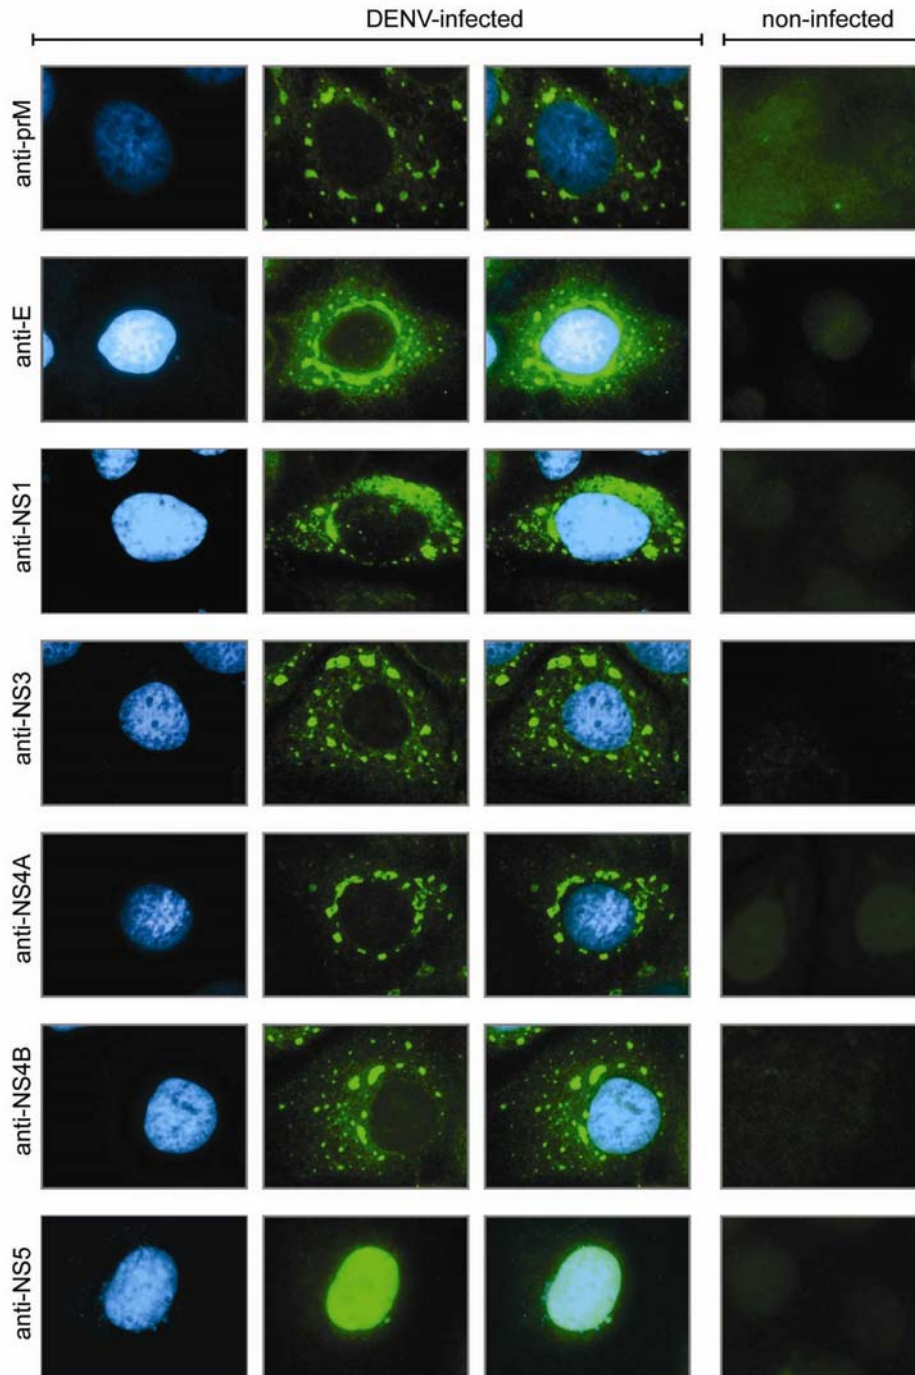

**Figure S1. Localization of DENV Proteins in Infected Cells**

Huh-7 cells were infected with DENV2 (column 1 to 3 from the left) or left uninfected (right column). The cells were fixed at 24 hr p.i. with 4% paraformaldehyde, permeabilized with 0.5% Triton X-100 in PBS, and processed for immunolabeling. DENV antigens were detected by using monospecific rabbit polyclonal antibodies directed against the DENV antigens indicated on the left. Nuclear DNA was stained with DAPI (4',6'-diamidino-2-phenylindole dihydrochloride). The three columns of DENV infected cells show (from left to right) DAPI, IF stain and merge, respectively.

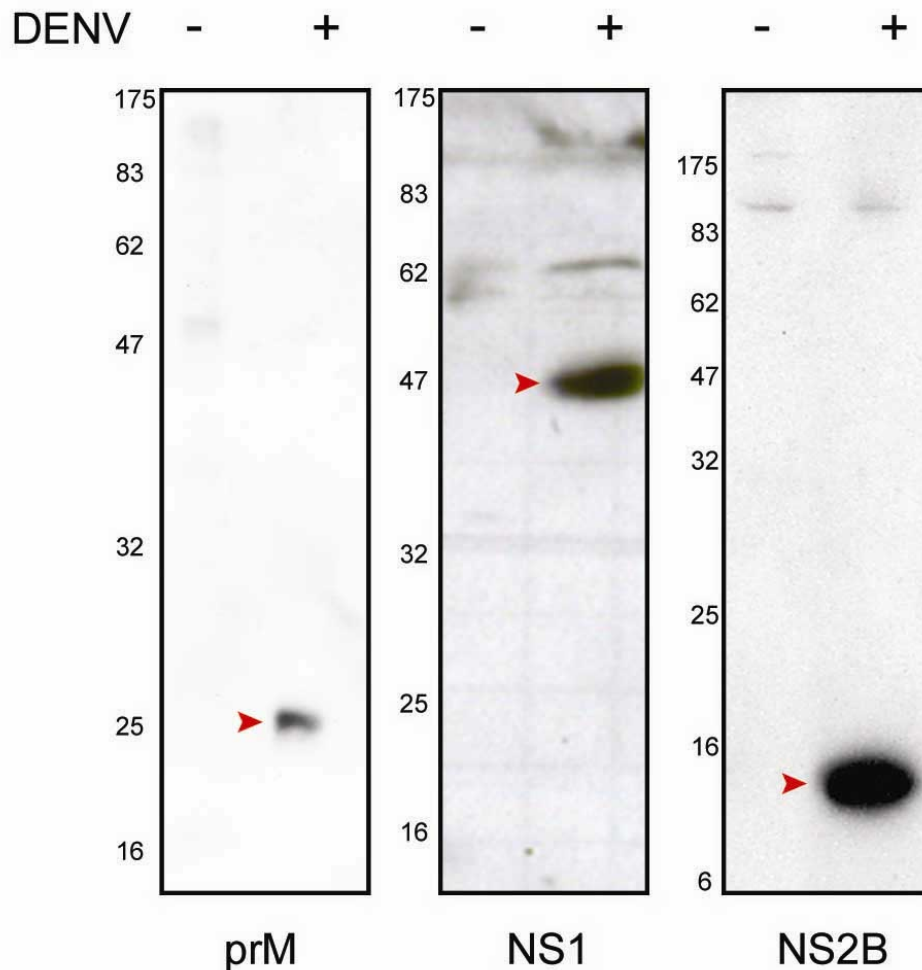

**Figure S2. Characterization of DENV-Specific Antisera by Western Blotting**

To investigate the localization of DENV NS-proteins in infected cells we generated rabbit polyclonal antisera monospecific for the individual non-structural proteins (production and characterization of antibodies directed against DENV-2 E, NS3, NS4A, NS4B, and NS5 was described elsewhere (Miller et al., 2007; Miller et al., 2006). After immunization of New Zealand White rabbits with recombinant purified DENV prM-, NS1- and NS2B-GST fusion proteins obtained antisera were characterized by Western blot analysis of lysates of DENV-infected Huh-7 cells. For this purpose, lysates of cells either infected with DENV (+) or mock-infected (-) were loaded onto a 12% polyacrylamide-SDS gel, and proteins were electrophoretically separated. After transfer of proteins to nitrocellulose membrane blots were incubated in blocking solution (5% milk powder and 0.5% Tween 20 in PBS) overnight at 4°C. Incubation with the primary antibody was performed in blocking solution for 1h at room temperature. Blots were washed 3 times for 10 min in washing solution (0.5% Tween 20 in PBS), incubated for 1h with the secondary

antibody in blocking solution, and washed again in the same way. Antibody-protein complexes were detected using the ECL plus western blotting detection system (Amersham Bioscience).

All antisera reacted with proteins of the expected sizes in DENV-infected, but not in mock-infected cells (red arrowheads). PrM was detected as a protein with an apparent molecular weight of approximately 26kDa. The NS1-specific antiserum detected an about 46 kDa protein corresponding to the expected size. In addition two NS1-reactive proteins with a higher molecular weight were observed. They may represent different glycosylated forms or homo- and hexameric forms of the protein as described elsewhere (Crooks et al., 1994; Flamand et al., 1999; Winkler et al., 1989; Winkler et al., 1988). NS2B was detected as a dominant 14 kDa species corresponding to the expected molecular weight (Falgout et al., 1993). These results confirmed the specificity of the rabbit antisera that were used throughout this study. Attempts to raise NS2A-specific antisera were not successful, probably due to poor immunogenicity and high hydrophobicity.

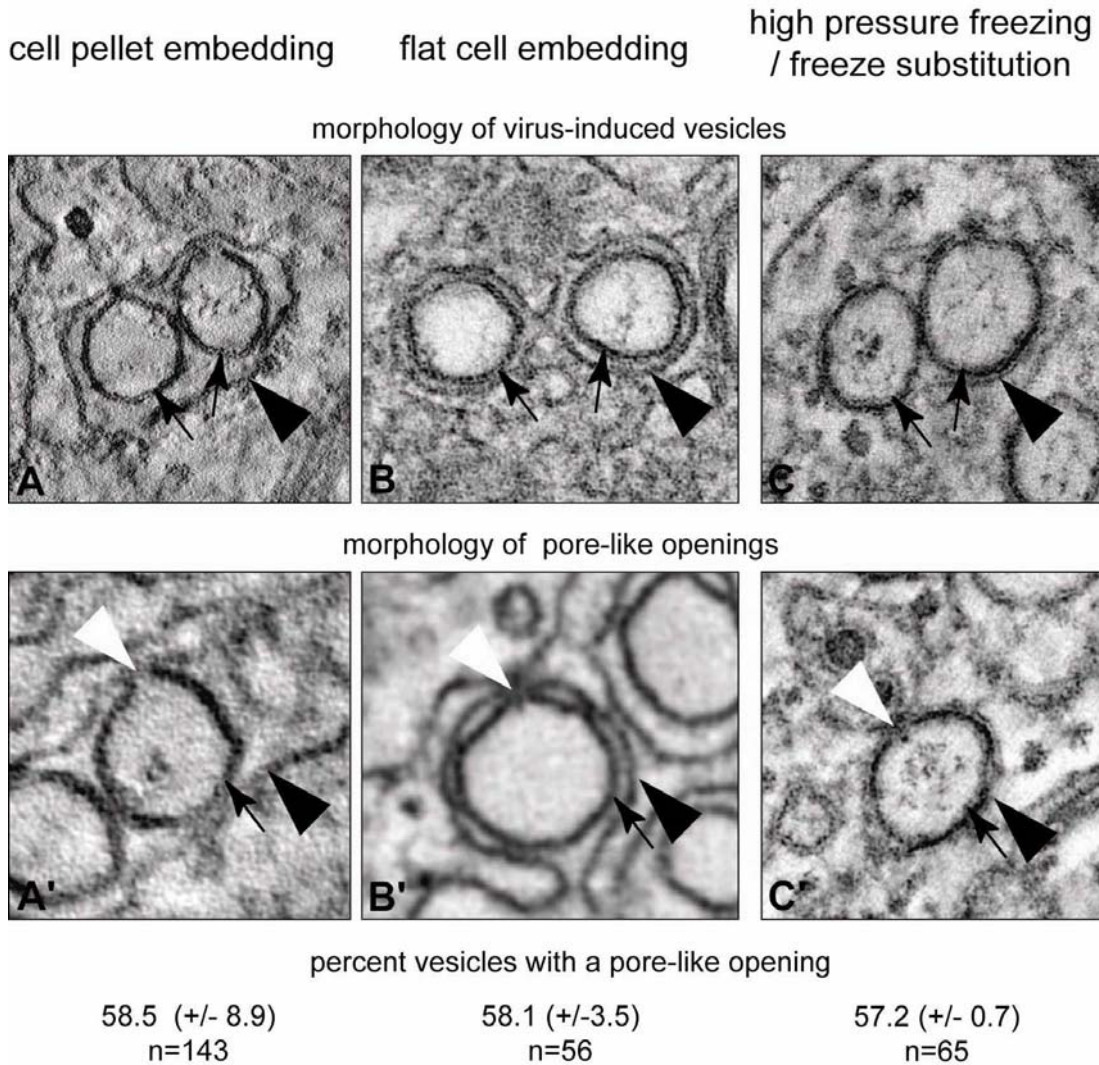

**Figure S3. Overall Appearance of Virus-Induced Vesicles Is Influenced by Sample Preparation Technique, but Visibility of Membrane Continuities or Vesicle Pores Is Consistent**

Huh-7 cells were infected with DENV2 and fixed 24 hr (left and middle panel) or 26.5 hr later (right panel) with 2.5% glutaraldehyde. Cells were then (A) scraped from the tissue culture substratum and embedded as a pellet or (B) flat-embedded on the tissue culture substratum at room temperature. In (C), cells were high-pressure frozen and freeze substituted at -90° to 0°C, followed by flat embedding at room temperature. In (A) the DENV-induced vesicles appear as single-membrane vesicles in the ER lumen, whereas in (B) the outer and inner membranes are more tightly apposed. In (C), the tight space between outer and inner membrane appears to be filled with an electron dense “glue”. Black arrowheads indicate outer ER membrane, small arrows indicate inner vesicle membrane. The appearance of pore-like vesicle openings and the diffuse electron density on their outside also depends on the sample preparation technique (A'-C', white arrowheads), but membrane continuities of outer ER and inner vesicle membranes are seen at similar ratios independently of the sample preparation technique (bottom panel).



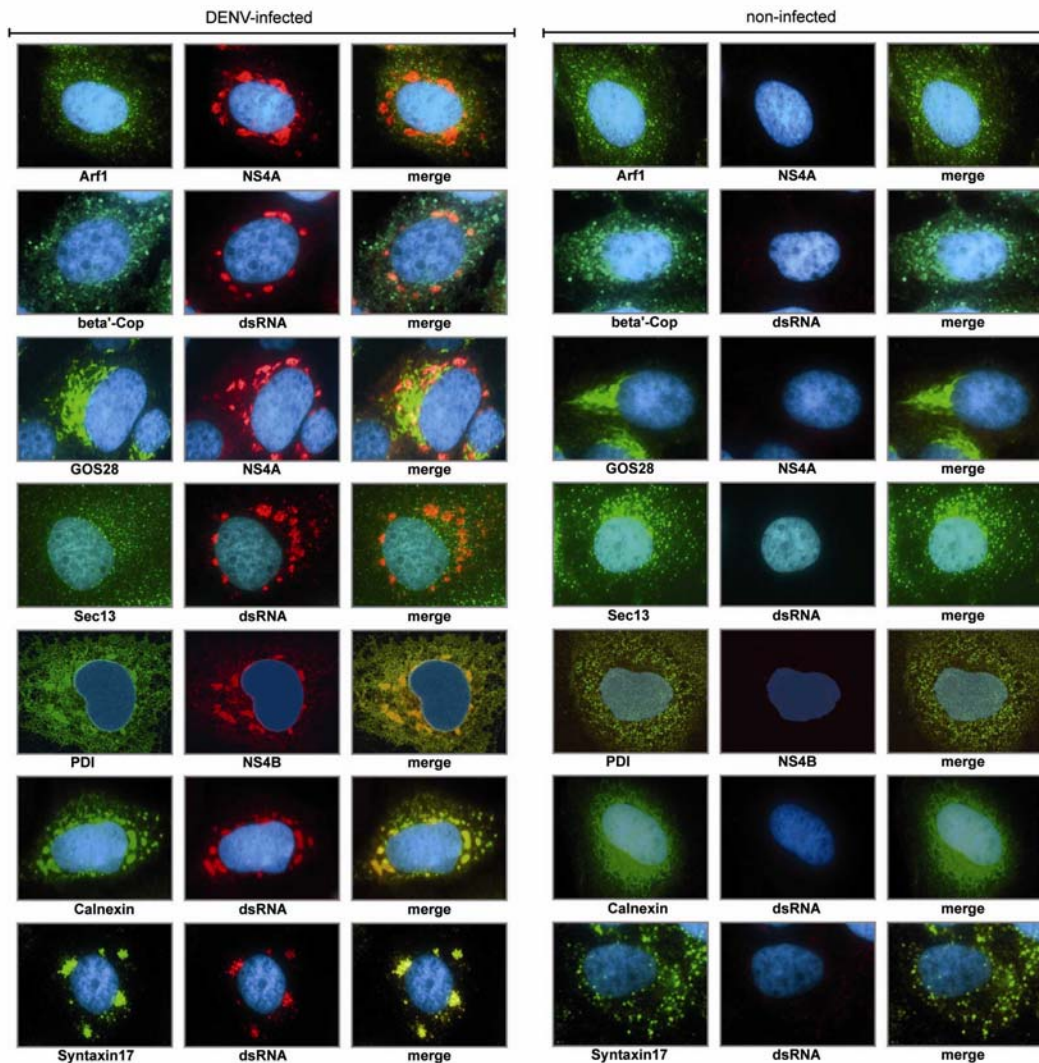

**Figure S4. Colocalization of Cellular Marker Proteins with DENV dsRNA or Proteins by Immunofluorescence Microscopy**

Huh-7 cells were infected with DENV2 (column 1 to 3 from the left) or left uninfected (column 4 to 6 from the left), fixed at 24 hr postinfection with 4% paraformaldehyde, permeabilized with 0.5% Triton X-100 in PBS and processed for immunofluorescence. Antibodies used for the detection of cellular marker proteins are given below each image. DENV NS4A was labeled with a monospecific rabbit polyclonal antibody; dsRNA, the presumed intermediate of DENV replication was labeled with a mouse monoclonal antibody. Nuclear DNA was stained with DAPI. The cellular markers for membranes involved in Golgi/vesicular trafficking, Arf1, GOS28, sec13 and  $\beta'$ -Cop (beta-Cop) do not co-localize with DENV-induced structures whereas the smooth ER marker Syntaxin17 as well as the ER markers PDI and calnexin show strong colocalization in infected ds cells. Cross-reaction of anti-Syntaxin17 antibody with anti-dsRNA antibody could be excluded by single labelling with anti-Syntaxin17 antibody (not shown). For a summary, see Table S1.

**Table S1. Colocalization of Cellular Marker Proteins with DENV-Induced Membrane Structures**

| Marker        | Reference/ Company                                                                      | Organelle                         | Colocalization with RC (IF) | Colocalization with RC (EM) | Experiments described in: |
|---------------|-----------------------------------------------------------------------------------------|-----------------------------------|-----------------------------|-----------------------------|---------------------------|
| Arf1          | Abcam, Cambridge, USA                                                                   | Vesicular trafficking             | no                          | NT                          | This study                |
| Calnexin      | Stressgen, Victoria, Canada; (Meacham et al., 1999)                                     | Rough ER                          | yes                         | yes                         | (Miller et al., 2007)     |
| CLIMP63       | Alexis Biochemicals, Lausen, Switzerland; (Schweizer et al., 1993)                      | Reticular subdomain of rough ER   | yes                         | NT                          | (Miller et al., 2006)     |
| ERGIC         | Alexis Biochemicals, Lausen, Switzerland; (Mitrovic et al., 2008)                       | ER-Golgi intermediate Compartment | no                          | NL                          | (Miller et al., 2006)     |
| GaT           | E. Berger, Zurich, Switzerland; (Steet and Kornfeld, 2006)                              | Trans Golgi                       | no                          | NL                          | (Miller et al., 2006)     |
| GM130         | Antonella de Matteis, Mario Negri Sud, Santa Maria imbargo, Italy; (Marra et al., 2001) | Cis Golgi                         | no                          | no                          | (Miller et al., 2006)     |
| Golgin97      | Molecular Probes, USA; (Norkin and Kuksin, 2005)                                        | Golgi apparatus                   | no                          | NT                          | (Miller et al., 2006)     |
| GOS28         | Acris, Herford, Germany                                                                 | Golgi SNARE protein               | no                          | NT                          | This study                |
| Lamp-1        | Iowa Hybridoma Bank; (Huynh and Andrews, 2005)                                          | Lysosomes/late endosomes          | no                          | no                          | This study                |
| Oil Red O     | Sigma, Deisenhofen, Germany; (Rouille et al., 2006)                                     | Lipid Droplets                    | no                          | NT                          | (Miller et al., 2006)     |
| P230          | BD Biosciences, Heidelberg, Germany; (Duran et al., 2008)                               | Trans Golgi                       | no                          | no                          | (Miller et al., 2007)     |
| PDI           | Stressgen, Victoria, Canada; (Zuber et al., 2007)                                       | Rough ER                          | yes                         | yes                         | (Miller et al., 2006)     |
| Sec13         | Wanjin Hong, IMB, Singapore; (Tang et al., 1997)                                        | COPII vesicular trafficking       | no                          | no                          | This study                |
| $\beta$ '-COP | Jeremy Simpson, EMBL, Heidelberg, Germany; (Lowe and Kreis, 1995)                       | COPI vesicular trafficking        | no                          | no                          | This study                |
| Syntaxin17    | R. Sheller, Stanford University, USA; (Reichelt et al., 2004)                           | Smooth ER                         | yes                         | NT                          | This study                |



Summary of colocalization studies of cellular marker proteins with DENV-induced membrane structures in this and previous studies (references in the rightmost column) at the level of light microscopy (third column from the left; dsRNA or viral nonstructural protein labeling was used as a marker of RC) and electron microscopy (second column from the right). Antibodies to cellular proteins and their organelle specificity are indicated. Source of the antibody and further references in which the corresponding antibodies were used are given (second column from left). NT, not tested; NL, no specific labeling by EM.

## Supplemental References

Crooks, A.J., Lee, J.M., Easterbrook, L.M., Timofeev, A.V., and Stephenson, J.R. (1994). The NS1 protein of tick-borne encephalitis virus forms multimeric species upon secretion from the host cell. *J Gen Virol* 75 (Pt 12), 3453-3460.

Duran, J.M., Kinseth, M., Bossard, C., Rose, D.W., Polishchuk, R., Wu, C.C., Yates, J., Zimmerman, T., and Malhotra, V. (2008). The role of GRASP55 in Golgi fragmentation and entry of cells into mitosis. *Molecular biology of the cell* 19, 2579-2587.

Falgout, B., Miller, R.H., and Lai, C.J. (1993). Deletion analysis of dengue virus type 4 nonstructural protein NS2B: identification of a domain required for NS2B-NS3 protease activity. *J Virol* 67, 2034-2042.

Flamand, M., Megret, F., Mathieu, M., Lepault, J., Rey, F.A., and Deubel, V. (1999). Dengue virus type 1 nonstructural glycoprotein NS1 is secreted from mammalian cells as a soluble hexamer in a glycosylation-dependent fashion. *J Virol* 73, 6104-6110.

Hoog, J.L., Schwartz, C., Noon, A.T., O'Toole, E.T., Mastronarde, D.N., McIntosh, J.R., and Antony, C. (2007). Organization of interphase microtubules in fission yeast analyzed by electron tomography. *Developmental cell* 12, 349-361.

Huynh, C., and Andrews, N.W. (2005). The small chemical vacuolin-1 alters the morphology of lysosomes without inhibiting Ca<sup>2+</sup>-regulated exocytosis. *EMBO Rep* 6, 843-847.

Lowe, M., and Kreis, T.E. (1995). In vitro assembly and disassembly of coatamer. *J Biol Chem* 270, 31364-31371.

Marra, P., Maffucci, T., Daniele, T., Tullio, G.D., Ikehara, Y., Chan, E.K., Luini, A., Beznoussenko, G., Mironov, A., and De Matteis, M.A. (2001). The GM130 and GRASP65 Golgi proteins cycle through and define a subdomain of the intermediate compartment. *Nat Cell Biol* 3, 1101-1113.

Meacham, G.C., Lu, Z., King, S., Sorscher, E., Tousson, A., and Cyr, D.M. (1999). The Hdj-2/Hsc70 chaperone pair facilitates early steps in CFTR biogenesis. *EMBO J* 18, 1492-1505.

Miller, S., Kastner, S., Krijnse-Locker, J., Buhler, S., and Bartenschlager, R. (2007). The non-structural protein 4A of dengue virus is an integral membrane protein inducing membrane alterations in a 2K-regulated manner. *J Biol Chem* 282, 8873-8882.

Miller, S., Sparacio, S., and Bartenschlager, R. (2006). Subcellular localization and membrane topology of the dengue virus type 2 non-structural protein 4B. *J Biol Chem*.

Mitrovic, S., Ben-Tekaya, H., Koegler, E., Gruenberg, J., and Hauri, H.P. (2008). The cargo receptors Surf4, endoplasmic reticulum-Golgi intermediate compartment (ERGIC)-53, and p25 are required to maintain the architecture of ERGIC and Golgi. *Molecular biology of the cell* 19, 1976-1990.

Norkin, L.C., and Kuksin, D. (2005). The caveolae-mediated sv40 entry pathway bypasses the golgi complex en route to the endoplasmic reticulum. *Virology* 2, 38.

Reichelt, M., Stertz, S., Krijnse-Locker, J., Haller, O., and Kochs, G. (2004). Missorting of LaCrosse virus nucleocapsid protein by the interferon-induced MxA GTPase involves smooth ER membranes. *Traffic* 5, 772-784.

Rouille, Y., Helle, F., Delgrange, D., Roingeard, P., Voisset, C., Blanchard, E., Belouzard, S., McKeating, J., Patel, A.H., Maertens, G., *et al.* (2006). Subcellular localization of hepatitis C virus structural proteins in a cell culture system that efficiently replicates the virus. *J Virol* 80, 2832-2841.

Sambrook, J., and D.W. Russel (2001). *Molecular cloning: a laboratory manual*, 3rd edn (Cold Spring Harbor, N. Y., Cold Spring Harbor Laboratory Press).

Schweizer, A., Ericsson, M., Bachi, T., Griffiths, G., and Hauri, H.P. (1993). Characterization of a novel 63 kDa membrane protein. Implications for the organization of the ER-to-Golgi pathway. *J Cell Sci* 104 ( Pt 3), 671-683.

Steet, R., and Kornfeld, S. (2006). COG-7-deficient Human Fibroblasts Exhibit Altered Recycling of Golgi Proteins. *Molecular biology of the cell* 17, 2312-2321.

Tang, B.L., Peter, F., Krijnse-Locker, J., Low, S.H., Griffiths, G., and Hong, W. (1997). The mammalian homolog of yeast Sec13p is enriched in the intermediate compartment and is essential for protein transport from the endoplasmic reticulum to the Golgi apparatus. *Mol Cell Biol* 17, 256-266.

Winkler, G., Maxwell, S.E., Ruemmler, C., and Stollar, V. (1989). Newly synthesized dengue-2 virus nonstructural protein NS1 is a soluble protein but becomes partially hydrophobic and membrane-associated after dimerization. *Virology* 171, 302-305.

Winkler, G., Randolph, V.B., Cleaves, G.R., Ryan, T.E., and Stollar, V. (1988). Evidence that the mature form of the flavivirus nonstructural protein NS1 is a dimer. *Virology* 162, 187-196.

Zuber, C., Cormier, J.H., Guhl, B., Santimaria, R., Hebert, D.N., and Roth, J. (2007). EDEM1 reveals a quality control vesicular transport pathway out of the endoplasmic reticulum not involving the COPII exit sites. *Proc Natl Acad Sci U S A* 104, 4407-4412.
